# Supplementary material
Source: PubMed Central journal article supplement (PMC7268183)
Supplement: 40620_2020_755_MOESM1_ESM.pdf [file 40620_2020_755_MOESM1_ESM.pdf]

## Journal of Nephrology

### Supplementary Material

#### COVID-19 and Kidney Transplantation: an Italian Survey and Consensus

Fabio Vistoli<sup>\*1</sup>, Lucrezia Furian<sup>\*2</sup>, Umberto Maggiore<sup>3</sup>, Rossana Caldara<sup>4</sup>, Vincenzo Cantaluppi<sup>5</sup>, Mariano Ferraresso<sup>6</sup>, Gianluigi Zaza<sup>7</sup>, Massimo Cardillo<sup>8</sup>, Giandomenico Biancofiore<sup>9</sup>, Francesco Menichetti<sup>10</sup>, Alessandro Russo<sup>10</sup>, Emanuela Turillazzi<sup>11</sup>, Marco Di Paolo<sup>11</sup>, Giuseppe Grandaliano<sup>^12</sup>, Ugo Boggi<sup>^1</sup> on behalf of the Italian National Kidney Transplantation Network\* and the Joint Committee of the Italian Society of Organ Transplantation and the Italian Society of Nephrology.

\*Fabio Vistoli and Lucrezia Furian share the first author position

^Giuseppe Grandaliano and Ugo Boggi share the senior author position

#### Affiliations

<sup>1</sup>Division of General and Transplant Surgery, University of Pisa, Italy; <sup>2</sup>Kidney and Pancreas Transplantation Unit, Department of Surgical, Oncological and Gastroenterological Sciences, University of Padova, Italy; <sup>3</sup>Kidney and Kidney-Pancreas Transplant Unit (Department of Nephrology), Parma University Hospital, Parma, Italy; <sup>4</sup>Department of Internal Medicine, Transplant Medicine Unit, San Raffaele Scientific Institute, Milan, Italy; <sup>5</sup>Nephrology and Kidney Transplantation Unit, University of Piemonte Orientale (UPO), Novara, Italy; <sup>6</sup>Renal Transplantation, Fondazione IRCCS Ca' Granda Ospedale Maggiore Policlinico, Milan, Italy; <sup>7</sup>Renal Unit, Department of Medicine, University Hospital of Verona, Verona, Italy; <sup>8</sup>North Italy Transplant program (NITp), UOC Coordinamento Trapianti, Fondazione IRCCS Ca' Granda-Ospedale Maggiore Policlinico, Milan, Italy; <sup>9</sup>Division of Anesthesia and Intensive Care, University of Pisa, Italy; <sup>10</sup>Division of Infectious Disease Control, University of Pisa, Pisa, Italy; <sup>11</sup>Section of Legal Medicine, Department of Surgical, Medical, Molecular Pathology and Critical Area, University of Pisa, Pisa, Italy; <sup>12</sup>Division of Nephrology, Università Cattolica del Sacro Cuore, Rome, Italy.

#### Corresponding Author:

Gianluigi Zaza, MD, PhD  
Renal Unit, Department of Medicine,  
University-Hospital of Verona,  
Piazzale A Stefani 1, 37126, Verona (VR), Italy  
Tel. 045.8122528; Fax 045.8027311  
E mail: gianluigi.zaza@univr.it

**Statements not reaching statistical significance (see also Table 3):**

- 1. *During COVID-19 pandemic, local graft allocation should be preferred to reduce migration of patients from areas of low-incidence to areas of high-incidence of infection.***
- 2. *During COVID-19 pandemic, graft shipping from areas of high-incidence to areas of low-incidence of infection should be preferred to migration of patients from areas of low-incidence to areas of high-incidence of infection.***
- 3. *During COVID-19 pandemic, asymptomatic patients with positive nasopharyngeal swabs should receive antibiotic prophylaxis.***
- 4. *During COVID-19 pandemic, modification of ACE-inhibitors based anti-hypertensive therapy should be considered in symptomatic kidney transplant recipients with positive nasopharyngeal swabs.***

The first two statements did not reach agreement because, as reported by the comment of participants to the consensus, the logistical and ethical challenges related to a change either in the allocation system or in the migration of patients towards transplant centers where they were not referred to nor listed in, seemed difficult to be applied on a large scale, whereas this decision should be taken in a case-by-case fashion.

The third statement did not reach agreement because in a large number of transplant centers, the utilization of antibiotic prophylaxis in viral infections is not part of a standardized therapeutic approach for kidney transplant recipients.

The fourth statement did not reach agreement because, although some reports suggest a role of the interaction between the SARS viruses and ACE2 as a potential factor in their infectivity, and propose the discontinuation of ACE inhibitors and angiotensin-receptor blockers (ARBs), data in humans were considered too limited to support or refute these hypotheses and concerns (1).

**REFERENCE:**

1. Vaduganathan M, Vardeny O, Michel T et al. Renin-Angiotensin-Aldosterone System Inhibitors in Patients with Covid-19. N Engl J Med 2020 Apr 23; 382:1653-1659.
